# Supplementary material for: Female AhR Knockout Mice Develop a Minor Renal Insufficiency in an Adenine-Diet Model of Chronic Kidney Disease
Source: PubMed Central journal article supplement (PMC7177716; doi:10.3390/ijms21072483), 2020-04-03
Supplement: ijms-21-02483-s001.pdf [file ijms-21-02483-s001.pdf]

## Supplementary Material

### Supplemental Table

**Table S1** CKD biochemical markers in male mice fed by alternating adenine-enriched diet and regular diet for 6 weeks.

|                     | Males WT    |                         | Males AhR <sup>-/-</sup> |                           |
|---------------------|-------------|-------------------------|--------------------------|---------------------------|
|                     | Normal Diet | Adenine diet            | Normal Diet              | Adenine diet              |
| Urea (mmol/L)       | 8.6 ± 0.4   | 32.0 ± 4.4 <sup>a</sup> | 8.3 ± 0.4                | 18.6 ± 2.2 <sup>b,c</sup> |
| Creatinine (μmol/L) | 32.3 ± 0.6  | 78.6 ± 7.7 <sup>a</sup> | 26.7 ± 1.1               | 55.6 ± 10.7 <sup>b</sup>  |

Data are expressed as mean ± SEM (n=5-10/group).<sup>a</sup> p<0.001 *versus* WT normal-diet group; <sup>b</sup> p<0.01 *versus* AhR<sup>-/-</sup> normal-diet group; <sup>c</sup> p<0.05 *versus* WT adenine-diet group.

**Table S2** List of primer references used in qPCR experiments

| Target genes    | TaqMan probes ID |
|-----------------|------------------|
| <i>Gusb</i>     | Mm01197698_m1    |
| <i>TNF-α</i>    | Mm00443258_m1    |
| <i>PAI-1</i>    | Mm00435860_m1    |
| <i>Col 1A1</i>  | Mm00801666_g1    |
| <i>Col 3A1</i>  | Mm01254476_m1    |
| <i>XDH</i>      | Mm00442110_m1    |
| <i>Cyp 2E1</i>  | Mm00491127_m1    |
| <i>Sult 1A1</i> | Mm00467072_m1    |
| <i>Slc 22A6</i> | Mm00456258_m1    |
| <i>Slc 22A8</i> | Mm00459534_m1    |

## Supplemental Figures

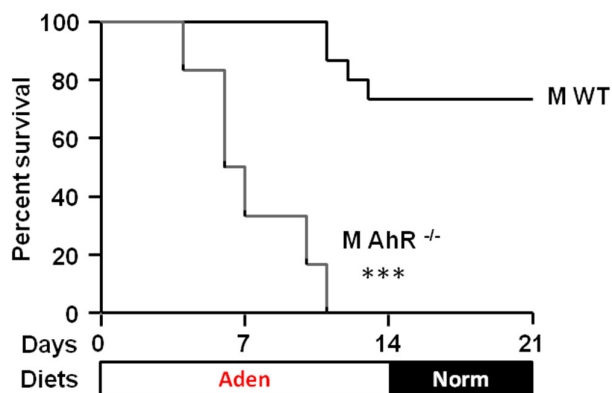

**Figure S1.** Kaplan-Meier survival curves of male (M) WT and AhR<sup>-/-</sup> mice fed by with a 0.25% adenine (Aden)-enriched diet for 14 days then with a regular diet (Norm) for 7 days. \*\*\*p < 0.001 (log-rank test).

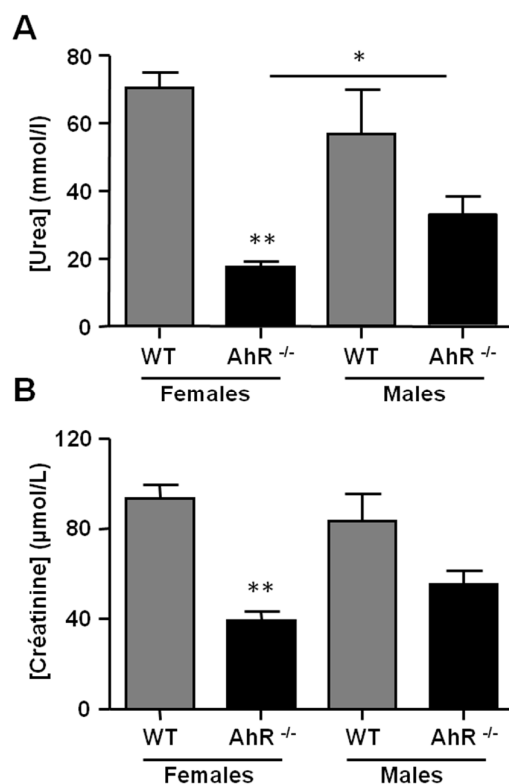

**Figure S2.** Urea (A) and creatinine (B) in the serum of mice (WT and AhR<sup>-/-</sup>) fed with 0.25% adenine-enriched diet for 1 week. Data are expressed as mean  $\pm$  SEM, n=5-7/group. \*P < 0.05; \*\*P < 0.01.
